# Supplementary material for: A highly conserved SOX6 double binding site mediates SOX6 gene downregulation in erythroid cells
Source: PubMed Central journal article supplement — Nucleic Acids Res. 2010 Sep 17;39(2):486–501. doi: 10.1093/nar/gkq819 (PMC3025548; doi:10.1093/nar/gkq819), 2010-09-17
Supplement: supp_gkq819_Figures_Supplementary_1-2.pdf [file supp_gkq819_Figures_Supplementary_1-2.pdf]

## Supplementary Figure 1: Transduced Sox6-Flag quantification

The expression level of the exogenous Sox6FLAG vs the endogenous transcript was estimated by Real Time PCR in K562 cells and in primary Human Cord Blood cells at day 10 of the culture, the central day of Sox6 expression, by comparing their expression with GAPDH expression, used as internal standard

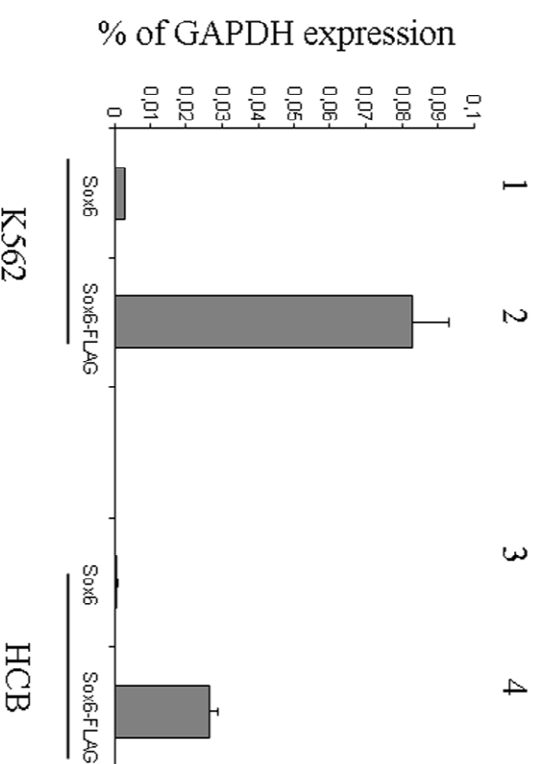

Columns hight represents the level of expression of endogenous Sox6 (1,3) and Sox6FLAG (2,4) relatively to GAPDH, used as internal standard.

Columns 1 and 3: untransduced cells;  
columns 2 and 4: cells transduced with the Sox6FLAG vector.

Primer pairs were designed to discriminate between endogenous and exogenous Sox6-FLAG transcripts (see experimental procedures). In both case the ratio is about 30 fold (K562: 29, CB: 30).  
Standard deviations refer to three independent amplifications.

Supplementary Figure 2: Sox6 has a general activation effect on several promoters

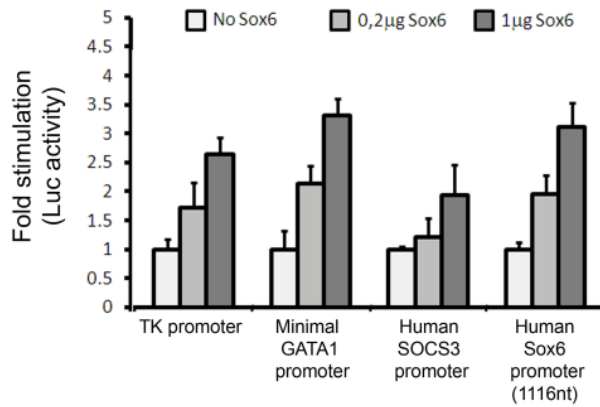

Transient transfection experiments in K562 cells demonstrate that Sox6 has a general activation effect on several promoters. All the reporter plasmids we tested show a reproducible transcriptional activation when cotransfected with increasing amounts (0,2 - 1 μg) of Sox6 expressing plasmid. The activity of each reporter plasmid in the absence of cotransfected Sox6 is set equal to 1.
